# Supplementary material for: Controlled self-assembly of amphiphilic monotailed single-chain nanoparticles
Source: Royal Society of Chemistry journal article supplement (doi:10.1039/c4py00100a), 2014-01-01
Supplement: c4py00100a1.pdf [file c4py00100a1.pdf]

## Supporting Information Part

### Controlled Self-Assembly of Amphiphilic Monotailed Single-chain Nanoparticles

Jianguo Wen, Jing Zhang, Yue Zhang, Yongfang Yang, and Hanying Zhao

**Characterization.**  $^1\text{H}$  NMR measurements were performed on a Varian UNITY-plus 400 M nuclear magnetic resonance spectrometer using deuterated  $\text{CDCl}_3$  as the solvent at room temperature. SEC experiments were carried on a gel permeation chromatograph equipped with Hitachi L-2130 HPLC pump, Hitachi L-2350 column oven operated at 40 °C, three Varian PL columns with 1000K-100K (100000 Å), 100K-10K (10000 Å), and 100-10K (1000 Å) molecular ranges, and a Hitachi L-2490 refractive index detector. THF was used as eluent at a flow rate of 1.0 mL/min. The apparent molecular weight was calculated based on PS standards. Transmission electron microscopy (TEM) images were obtained on a Tecnai G2 20 S-TWIN electron microscope equipped with a Model 794 CCD camera (512×512) at an operating voltage of 200 kV. In order to prepare TEM specimens, each polymer solution was deposited onto a Formvar coated copper grid and then blotted with filter paper to remove excess solution. The hydrodynamic diameters of the micelles were measured on a Malvern Zetasizer Nano-ZS equipped with a 10 mW HeNe laser at a wavelength of 633 nm. The results were analyzed in CONTIN mode.

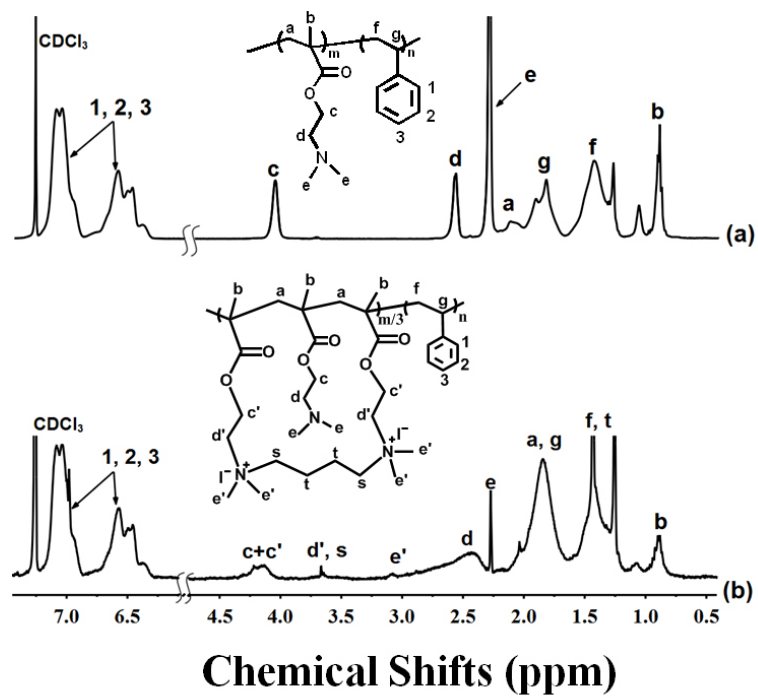

**Figure S1.**  $^1\text{H}$  NMR spectra of PDMAEMA<sub>30</sub>-*b*-PS<sub>169</sub> and NP<sub>0.2</sub>-PDMAEMA<sub>30</sub>-*b*-PS<sub>169</sub>.

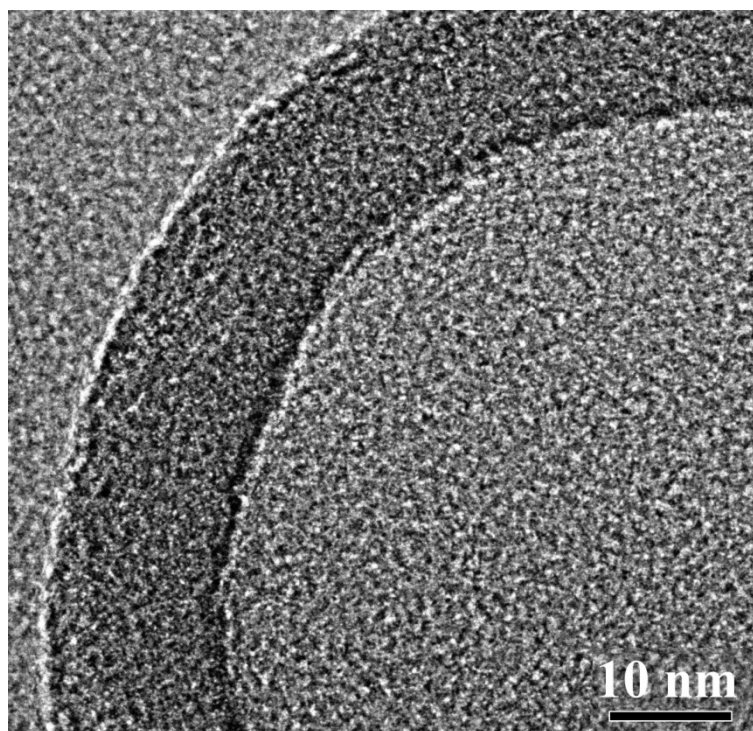

**Fig. S2** A magnified TEM image of a vesicle made from NP<sub>0.68</sub>-PDMAEMA<sub>74</sub>-*b*-PS<sub>100</sub> in aqueous solution.
